# Supplementary material for: Virus Diversity, Abundance, and Evolution in Three Different Bat Colonies in Switzerland
Source: MDPI journal article supplement (doi:10.3390/v14091911), 2022-08-29
Supplement: s1 [file s1]

| Year | Forward                       | Reverse                       | Product length |
|------|-------------------------------|-------------------------------|----------------|
| 2019 | 5'-GCTCTCAGCGTGTCTACTGATG-3'  | 5'-ACCACTCAGCGTTTTTCATCCTC-3' | 791nt          |
|      | 5'-TACGTCGTTTGGGAAACACC-3'    | 5'-CAACATTGGTGTCAATTCGCAC-3'  | 1166nt         |
|      | 5'-TCATCTCTGTTTCAGTATGGCAC-3' | 5'-RCCAGGRTCAGCAATAGTAACC-3'  | 977nt          |
|      | 5'-TGGTGCTAATCTTAGACARGATG-3' | 5'-AGAAGTAAARCCCGTYTGGWG-3'   | 902nt          |
|      | 5'-AAATGGATTYTGCGGATCTGG-3'   | 5'-TGGACATGAATCTTATGTGGCTC-3' | 726nt          |
| 2020 | 5'-ACTCTCARYGKTCTACTGATG-3'   | 5'-GATGCTGCGTGGAATGACTG-3'    | 919nt          |
|      | 5'-AGAAAAGGGGACTTGTATGGTGG-3' | 5'-ACATTGGTGTCAATTCGCACAG-3'  | 944nt          |
|      | 5'-TCATCTCTGTTTCAGTATGGCAC-3' | 5'-RCCAGGRTCAGCAATAGTAACC-3'  | 977nt          |
|      | 5'-TGGTGCTAATCTTAGACARGATG-3' | 5'-AGAAGTAAARCCCGTYTGGWG-3'   | 902nt          |
|      | 5'-AAATGGATTYTGCGGATCTGG-3'   | 5'-TGGACATGAATCTTATGTGGCTC-3' | 726nt          |
| 2021 | 5'-ACTCTCARYGKTCTACTGATG-3'   | 5'-GATGCTGCGTGGAATGACTG-3'    | 919nt          |
|      | 5'-CCTCTTTGCATCTTTCCTG-3'     | 5'-AGWGCAGTTWTGRAAGACACC-3'   | 1000nt         |
|      | 5'-GGCTGTTCGCAACGATACAAAG-3'  | 5'-CCAGTCAAACCTGCATCAAGC-3'   | 812nt          |
|      | 5'-TGGTGCTAATCTTAGACARGATG-3' | 5'-AGAAGTAAARCCCGTYTGGWG-3'   | 902nt          |
|      | 5'-AAATGGATTYTGCGGATCTGG-3'   | 5'-TGGACATGAATCTTATGTGGCTC-3' | 726nt          |
