# Supplementary material for: Virus Diversity, Abundance, and Evolution in Three Different Bat Colonies in Switzerland
Source: MDPI journal article supplement (doi:10.3390/v14091911), 2022-08-29
Supplement: s1 [file s1]

Figure S1. Heatmap of specific genomes of viruses from invertebrates detected in the AG colony aligned to a collection of reference sequences. The first column shows the number of reads in a logarithmic scale, the second RPM, and the third the percent genome coverage. The read numbers are represented in a gradient from black (low numbers) to light yellow (high numbers). For the percent genome coverage black indicates 0% and light-yellow

Figure S2. Heatmap of specific genomes of viruses from invertebrates detected in the GR colony aligned to a collection of reference sequences. The first column shows the number of reads in a logarithmic scale, the second RPM, and the third the percent genome coverage. The read numbers are represented in a gradient from black (low numbers) to light yellow (high numbers). For the percent genome coverage black indicates 0% and light-yellow 100

Figure S3. Heatmap of specific genomes of viruses from invertebrates detected in the LU colony aligned to a collection of reference sequences. The first column shows the number of reads in a logarithmic scale, the second RPM, and the third the percent genome coverage. The read numbers are represented in a gradient from black (low numbers) to light yellow (high numbers). For the percent genome coverage black indicates 0% and light-yellow 100%.

Table S1. Database of viruses specific to each colony used for the alignments. In white are marked vertebrate viruses and in grey invertebrate viruses.

**Table S2.** The primer pairs used for sequencing of the spike protein locus of the MERS-related CoVs from the Aargau colony including the expected product length.
