# Supplementary material for: Virus Diversity, Abundance, and Evolution in Three Different Bat Colonies in Switzerland
Source: MDPI journal article supplement (doi:10.3390/v14091911), 2022-08-29
Supplement: s1 [file s1]

| Colony | Accession number | Virus genome                                                   |
|--------|------------------|----------------------------------------------------------------|
| AG     | LC456717         | Bat_associated_circovirus_10                                   |
|        | MT815982         | Bat_associated_circovirus                                      |
|        | KX064237         | Bat_bunyavirus_JTM                                             |
|        | MT734803         | Bat_chaphamaparvovirus                                         |
|        | NC_035799        | Bat_circovirus                                                 |
|        | KM382272         | Bat_circovirus_POA_2012_V                                      |
|        | JX065122         | Bat_mastadenovirus                                             |
|        | LC385827         | Bat_mastadenovirus                                             |
|        | NC_029902        | Bat_mastadenovirus_WIV11                                       |
|        | KY302871         | Circovirus_sp_                                                 |
|        | MG596802         | Middle_East_respiratory_syndrome_related_coronavirus_MERS_CoV_ |
|        | MG596803         | Middle_East_respiratory_syndrome_related_coronavirus_MERS_CoV_ |
|        | MG021451         | Middle_East_respiratory_syndrome_related_coronavirus_MERS_CoV_ |
|        | MG021452         | Middle_East_respiratory_syndrome_related_coronavirus_MERS_CoV_ |
|        | KT732793         | Pacific_flying_fox_faeces_associated_gemycircularvirus_2       |
|        | KC522090         | Pipistrellus_bat_coronavirus_HKU5                              |
|        | LC426677         | Pipistrellus_pipistrellus_polyomavirus_1                       |
|        | LC426707         | Scotophilus_kuhlii_polyomavirus_2                              |
|        | NC_030843        | Washington_bat_picornavirus                                    |
|        | M37899           | Aedes_aegypti_densovirus_1                                     |
|        | KJ817182         | Aphid_lethal_paralysis_virus                                   |
|        | NC_040347        | Bark_beetle_associated_genomovirus_1                           |
|        | KY933259         | Big_Sioux_River_virus                                          |
|        | NC_001411        | Black_beetle_virus                                             |
|        | MK433236         | Blackfly_genomovirus_4                                         |
|        | EF517505         | Black_queen_cell_virus                                         |
|        | AF329080         | Boolarra_virus                                                 |
|        | AF375296         | Casphalia_extranea_densovirus                                  |
|        | NC_025219        | Cripavirus_NB_1_2011_HUN                                       |
|        | MH188015         | Culex_iflavi_like_virus_4                                      |
|        | NC_028489        | Daeseongdong_virus_2                                           |
|        | NC_023842        | Danaus_plexippus_plexippus_iteravirus                          |
|        | AY594353         | Dendrolimus_punctatus_virus                                    |
|        | MN328434         | Diamondback_moth_iflavirus                                     |
|        | NC_025835        | Dinocampus_coccinellae_paralysis_virus                         |
|        | NC_005092        | Ectropis_obliqua_picorna_like_virus                            |
|        | EF690537         | Flock_House_virus                                              |
|        | KX423453         | Helicoverpa_armigera_stunt_virus                               |
|        | NC_033140        | Hubei_permutotetra_like_virus_4                                |
|        | NC_033148        | Hubei_picorna_like_virus_60                                    |
|        | KX884604         | Hubei_tetragnatha_maxillosa_virus_9                            |
|        | KX884676         | Hubei_tetragnatha_maxillosa_virus_9                            |
|        | KX883169         | Hubei_tombus_like_virus_28                                     |
|        | MG963176         | Iteravirus_sp_                                                 |
|        | NC_015115        | Mosquito_densovirus_BR_07                                      |
|        | MH477289         | Myrmica_scabrinodis_virus_2                                    |
|        | KM598406         | Odonata_associated_circular_virus_20                           |
|        | NC_027917        | Opsiphanes_invirae_iflavirus_1                                 |

|    |           |                                               |
|----|-----------|-----------------------------------------------|
|    | NC_003113 | Perina_nuda_virus                             |
|    | MN535735  | Rhopalosiphum_padi_virus__bat_metagenome__    |
|    | KY465674  | Sacbrood_virus                                |
|    | NC_033173 | Sanxia_water_strider_virus_9                  |
|    | NC_018399 | Sibine_fusca_densovirus                       |
|    | MK733235  | Sitobion_miscanthi_virus_1                    |
|    | MK543949  | Tetranychus_urticae_associated_ambidensovirus |
|    | MF173065  | Tick_associated_genomovirus_1                 |
|    | NC_040326 | Tubeweb_spider_associated_circular_virus_1    |
|    | NC_037062 | Varroa_mite_associated_genomovirus_1          |
|    | NC_040584 | Yongsan_picorna_like_virus_3                  |
| GR | GU226971  | Bat_adeno_associated_virus_YNM__BtAAV__       |
|    | NC_038389 | Bat_associated_circovirus_7                   |
|    | NC_038390 | Bat_associated_circovirus_8                   |
|    | MT815981  | Bat_associated_circovirus                     |
|    | NC_038400 | Bat_associated_cyclovirus_11                  |
|    | NC_038395 | Bat_associated_cyclovirus_4                   |
|    | KX064237  | Bat_bunyavirus_JTM                            |
|    | MG600411  | Bat_hepadnavirus                              |
|    | KY962687  | Bat_Hepatitis_B_virus                         |
|    | NC_029902 | Bat_mastadenovirus_WIV11                      |
|    | NC_029898 | Bat_mastadenovirus_WIV9                       |
|    | MN433617  | Bat_rotavirus                                 |
|    | MN433618  | Bat_rotavirus                                 |
|    | MN433619  | Bat_rotavirus                                 |
|    | MN433620  | Bat_rotavirus                                 |
|    | MN433621  | Bat_rotavirus                                 |
|    | MN433622  | Bat_rotavirus                                 |
|    | MN433623  | Bat_rotavirus                                 |
|    | MN433624  | Bat_rotavirus                                 |
|    | MN433625  | Bat_rotavirus                                 |
|    | MN433626  | Bat_rotavirus                                 |
|    | MN433627  | Bat_rotavirus                                 |
|    | KY302864  | Circovirus_sp__                               |
|    | KY302872  | Circovirus_sp__                               |
|    | JQ762360  | Fruit_bat_parvovirus                          |
|    | KU597751  | Human_rotavirus_A                             |
|    | KM043060  | lesser_horseshoe_bat_adenovirus_1             |
|    | KX263309  | Mammalian_orthoreovirus_1                     |
|    | KX263308  | Mammalian_orthoreovirus_1                     |
|    | KX263307  | Mammalian_orthoreovirus_1                     |
|    | KX263311  | Mammalian_orthoreovirus_1                     |
|    | KX263310  | Mammalian_orthoreovirus_1                     |
|    | KX263312  | Mammalian_orthoreovirus_1                     |
|    | KX263314  | Mammalian_orthoreovirus_1                     |
|    | KX263316  | Mammalian_orthoreovirus_1                     |
|    | KX263315  | Mammalian_orthoreovirus_1                     |
|    | KU194671  | Mammalian_orthoreovirus_2                     |
|    | MW582622  | Mammalian_orthoreovirus                       |

---

|          |                         |
|----------|-------------------------|
| MW582623 | Mammalian_orthoreovirus |
| MW582624 | Mammalian_orthoreovirus |
| MW582625 | Mammalian_orthoreovirus |
| MW582626 | Mammalian_orthoreovirus |
| MW582627 | Mammalian_orthoreovirus |
| MW582629 | Mammalian_orthoreovirus |
| MW582630 | Mammalian_orthoreovirus |
| MW582631 | Mammalian_orthoreovirus |
| KM087105 | Mammalian_orthoreovirus |
| KM087106 | Mammalian_orthoreovirus |
| KM087107 | Mammalian_orthoreovirus |
| KM087108 | Mammalian_orthoreovirus |
| KM087109 | Mammalian_orthoreovirus |
| KM087110 | Mammalian_orthoreovirus |
| KM087112 | Mammalian_orthoreovirus |
| KM087113 | Mammalian_orthoreovirus |
| KM087114 | Mammalian_orthoreovirus |
| MG457078 | Mammalian_orthoreovirus |
| MG457079 | Mammalian_orthoreovirus |
| MG457080 | Mammalian_orthoreovirus |
| MG457081 | Mammalian_orthoreovirus |
| MG457082 | Mammalian_orthoreovirus |
| MG457083 | Mammalian_orthoreovirus |
| MG457084 | Mammalian_orthoreovirus |
| MG457085 | Mammalian_orthoreovirus |
| MG457086 | Mammalian_orthoreovirus |
| MG457087 | Mammalian_orthoreovirus |
| MG457098 | Mammalian_orthoreovirus |
| MG457100 | Mammalian_orthoreovirus |
| MG457101 | Mammalian_orthoreovirus |
| MG457102 | Mammalian_orthoreovirus |
| MG457103 | Mammalian_orthoreovirus |
| MG457105 | Mammalian_orthoreovirus |
| MG457106 | Mammalian_orthoreovirus |
| MG457107 | Mammalian_orthoreovirus |
| MG457108 | Mammalian_orthoreovirus |
| MG457110 | Mammalian_orthoreovirus |
| MG457111 | Mammalian_orthoreovirus |
| MG457112 | Mammalian_orthoreovirus |
| MG457113 | Mammalian_orthoreovirus |
| MG457115 | Mammalian_orthoreovirus |
| MG457116 | Mammalian_orthoreovirus |
| MG457118 | Mammalian_orthoreovirus |
| MG457119 | Mammalian_orthoreovirus |
| MG457120 | Mammalian_orthoreovirus |
| MG457121 | Mammalian_orthoreovirus |
| MG457122 | Mammalian_orthoreovirus |
| MG457123 | Mammalian_orthoreovirus |
| MG457124 | Mammalian_orthoreovirus |

---

|          |                                                      |
|----------|------------------------------------------------------|
| MG457125 | Mammalian_orthoreovirus                              |
| MG457126 | Mammalian_orthoreovirus                              |
| MG457127 | Mammalian_orthoreovirus                              |
| KT444524 | Mammalian_orthoreovirus                              |
| KT444522 | Mammalian_orthoreovirus                              |
| KT444526 | Mammalian_orthoreovirus                              |
| KT444525 | Mammalian_orthoreovirus                              |
| KT444527 | Mammalian_orthoreovirus                              |
| KT444531 | Mammalian_orthoreovirus                              |
| KT444530 | Mammalian_orthoreovirus                              |
| KT444581 | Mammalian_orthoreovirus                              |
| KT444572 | Mammalian_orthoreovirus                              |
| KT444574 | Mammalian_orthoreovirus                              |
| KT444575 | Mammalian_orthoreovirus                              |
| KT444576 | Mammalian_orthoreovirus                              |
| KT444577 | Mammalian_orthoreovirus                              |
| KT444579 | Mammalian_orthoreovirus                              |
| KT444580 | Mammalian_orthoreovirus                              |
| KT444534 | Mammalian_orthoreovirus                              |
| KT444532 | Mammalian_orthoreovirus                              |
| KT444536 | Mammalian_orthoreovirus                              |
| KT444535 | Mammalian_orthoreovirus                              |
| KT444537 | Mammalian_orthoreovirus                              |
| KT444541 | Mammalian_orthoreovirus                              |
| KT444540 | Mammalian_orthoreovirus                              |
| KT444544 | Mammalian_orthoreovirus                              |
| KT444542 | Mammalian_orthoreovirus                              |
| KT444546 | Mammalian_orthoreovirus                              |
| KT444545 | Mammalian_orthoreovirus                              |
| KT444547 | Mammalian_orthoreovirus                              |
| KT444551 | Mammalian_orthoreovirus                              |
| KT444550 | Mammalian_orthoreovirus                              |
| KT444554 | Mammalian_orthoreovirus                              |
| KT444552 | Mammalian_orthoreovirus                              |
| KT444556 | Mammalian_orthoreovirus                              |
| KT444555 | Mammalian_orthoreovirus                              |
| KT444557 | Mammalian_orthoreovirus                              |
| KT444561 | Mammalian_orthoreovirus                              |
| KT444560 | Mammalian_orthoreovirus                              |
| KT444564 | Mammalian_orthoreovirus                              |
| KT444563 | Mammalian_orthoreovirus                              |
| KT444562 | Mammalian_orthoreovirus                              |
| KT444566 | Mammalian_orthoreovirus                              |
| KT444565 | Mammalian_orthoreovirus                              |
| KT444567 | Mammalian_orthoreovirus                              |
| KT444569 | Mammalian_orthoreovirus                              |
| KT444571 | Mammalian_orthoreovirus                              |
| KT444570 | Mammalian_orthoreovirus                              |
| JQ412755 | Mammalian_Orthoreovirus_strain_T3_Bat_Germany_342_08 |

|           |                                                          |
|-----------|----------------------------------------------------------|
| JQ412756  | Mammalian_Orthoreovirus_strain_T3_Bat_Germany_342_08     |
| JQ412758  | Mammalian_Orthoreovirus_strain_T3_Bat_Germany_342_08     |
| JQ412759  | Mammalian_Orthoreovirus_strain_T3_Bat_Germany_342_08     |
| NC_038485 | Pacific_flying_fox_faeces_associated_gemycircularvirus_2 |
| NC_038493 | Pteropus_associated_gemycircularvirus_10                 |
| NC_038488 | Pteropus_associated_gemycircularvirus_5                  |
| KC960619  | Rotavirus_A                                              |
| MN539290  | Rotavirus_A                                              |
| MT796864  | Rotavirus_A                                              |
| LC576609  | Rotavirus_A                                              |
| KC178799  | Rotavirus_A                                              |
| HQ846846  | Rotavirus_A                                              |
| MT226638  | Rotavirus_A                                              |
| MT226640  | Rotavirus_A                                              |
| KF690125  | Rotavirus_A                                              |
| KU243602  | Rotavirus_G3                                             |
| NC_030843 | Washington_bat_picornavirus                              |
| AY095351  | Aedes_albopictus_C6_36_cell_densovirus                   |
| JX045858  | Aphid_lethal_paralysis_virus                             |
| MK704471  | Aphid_lethal_paralysis_virus                             |
| MG571099  | Bark_beetle_associated_genomovirus_3                     |
| KX883903  | Beihai_picorna_like_virus_76                             |
| MK433234  | Blackfly_genomovirus_2                                   |
| MK433238  | Blackfly_genomovirus_6                                   |
| KP119603  | Black_queen_cell_virus                                   |
| NC_005041 | Blattella_germanica_densovirus_1                         |
| JQ320376  | Blattella_germanica_densovirus_like_virus                |
| KP714090  | Bloomfield_virus                                         |
| KP714095  | Bloomfield_virus                                         |
| MH614292  | Boghill_Burn_virus                                       |
| MF953177  | Brandeis_virus                                           |
| NC_004288 | Casphalia_extranea_densovirus                            |
| NC_025219 | Cripavirus_NB_1_2011_HUN                                 |
| MH188043  | Culex_densovirus                                         |
| MH188004  | Culex_dicistrovirus_1                                    |
| NC_040574 | Culex_lflavi_like_virus_4                                |
| MH188026  | Culex_mosquito_virus_1                                   |
| MF176305  | Culex_negev_like_virus_1                                 |
| NC_012685 | Culex_pipiens_densovirus                                 |
| JQ659255  | Culex_Y_virus                                            |
| KU095842  | Daeseongdong_virus_2                                     |
| NC_023842 | Danaus_plexippus_plexippus_iteravirus                    |
| JN857348  | Densovirus_SC3908                                        |
| NC_023871 | Dragonfly_associated_circular_virus_2                    |
| GQ342962  | Drosophila_melanogaster_birnavirus_SW_2009a              |
| KU754527  | Eridge_virus                                             |
| KU754528  | Eridge_virus                                             |
| NC_016518 | Espirito_Santo_virus                                     |
| NC_016517 | Espirito_Santo_virus                                     |

|    |           |                                                |
|----|-----------|------------------------------------------------|
|    | DNVCAPSID | Galleria_mellonella_densovirus                 |
|    | NC_029052 | Goose_dicistrovirus                            |
|    | MH545499  | Grasshopper_associated_circular_virus_1        |
|    | NC_024016 | Heliconius_erato_iflavivirus                   |
|    | MF176264  | Hubei_chryso_like_virus_1                      |
|    | KX882764  | Hubei_mosquito_virus_2                         |
|    | NC_033157 | Hubei_picorna_like_virus_58                    |
|    | KC883978  | Junonia_coenia_densovirus                      |
|    | NC_007619 | Kelp_fly_virus                                 |
|    | NC_015115 | Mosquito_densovirus_BR_07                      |
|    | JX403941  | Mosquitoe_x_virus                              |
|    | MH477289  | Myrmica_scabrinodis_virus_2                    |
|    | KM598406  | Odonata_associated_circular_virus_20           |
|    | NC_038482 | Odonata_associated_gemycircularvirus_1         |
|    | NC_027917 | Opsiphanes_invirae_iflavivirus_1               |
|    | NC_011588 | Oryctes_rhinoceros_nudivirus                   |
|    | NC_031450 | Parus_major_densovirus                         |
|    | NC_040344 | Pimoid_spider_associated_circular_virus_2      |
|    | NC_034217 | Pityohyphantes_rubrofasciatus_iflavivirus      |
|    | JX645046  | Pseudoplusia_includens_densovirus              |
|    | NC_033173 | Sanxia_water_strider_virus_9                   |
|    | NC_040338 | Sierra_dome_spider_associated_circular_virus_1 |
|    | MK733235  | Sitobion_miscanthi_virus_1                     |
|    | NC_022748 | Solenopsis_invicta_densovirus                  |
|    | MH545503  | Spider_associated_circular_virus_1             |
|    | NC_040368 | Spinybacked_orbweaver_circular_virus_1         |
|    | NC_016405 | Spodoptera_exigua_iflavivirus_1                |
|    | MH545502  | Termite_associated_circular_virus_2            |
|    | NC_033747 | Thrips_associated_genomovirus_4                |
|    | KY457233  | Tomelloso_virus                                |
|    | NC_040326 | Tubeweb_spider_associated_circular_virus_1     |
|    | KX884091  | Wuhan_fly_virus_5                              |
| LU | MH170363  | Artibeus_lituratus_parvovirus                  |
|    | KX907135  | Bastrovirus_like_virus_VietNam_Bat_17819_21    |
|    | MH167452  | Bat_adeno_associated_virus                     |
|    | GU226971  | Bat_adeno_associated_virus_YNM_BtAAV_          |
|    | JN252129  | Bat_adenovirus_2                               |
|    | NC_016895 | Bat_adenovirus_TJM_BtAdV_                      |
|    | MG923574  | Bat_alphacoronavirus                           |
|    | MN065811  | Bat_alphacoronavirus                           |
|    | MT815980  | Bat_associated_circovirus                      |
|    | MN832787  | Bat_astrovirus_bat_metagenome_                 |
|    | MT734803  | Bat_chaphamaparvovirus                         |
|    | MN535734  | Bat_coronavirus_bat_metagenome_                |
|    | MN535733  | Bat_coronavirus_bat_metagenome_                |
|    | KY770850  | Bat_coronavirus                                |
|    | NC_038316 | Bat_hepatovirus_BUO2BF86Colafr2010             |
|    | LC385828  | Bat_mastadenovirus_A                           |
|    | MF540585  | Bat_mastadenovirus                             |

|           |                                                          |
|-----------|----------------------------------------------------------|
| KJ641665  | Bat_parvovirus                                           |
| MZ218061  | Bat_picornavirus__bat_metagenome_                        |
| MN433617  | Bat_rotavirus                                            |
| MN433618  | Bat_rotavirus                                            |
| MN433619  | Bat_rotavirus                                            |
| MN433620  | Bat_rotavirus                                            |
| MN433621  | Bat_rotavirus                                            |
| MN433622  | Bat_rotavirus                                            |
| MN433623  | Bat_rotavirus                                            |
| MN433624  | Bat_rotavirus                                            |
| MN433625  | Bat_rotavirus                                            |
| MN433626  | Bat_rotavirus                                            |
| MN433627  | Bat_rotavirus                                            |
| KJ473806  | BtMr_AlphaCoV_SAX2011                                    |
| KY302869  | Circovirus_sp_                                           |
| KY302871  | Circovirus_sp_                                           |
| MF579866  | Dependoparvovirus_sp_                                    |
| KX907333  | Desmodus_rotundus_parvovirus                             |
| KM043106  | greater_mouse_eared_bat_adenovirus_1                     |
| JF304919  | Human_rotavirus_A                                        |
| NC_029797 | Megabat_bufavirus_1                                      |
| LC426674  | Myotis_horsfieldii_polyomavirus_1                        |
| NC_039045 | Myotis_myotis_bocavirus_1                                |
| KC154060  | Myotis_ricketti_parvovirus                               |
| KF294381  | Neixiang_Md_bat_coronavirus                              |
| KT732793  | Pacific_flying_fox_faeces_associated_gemycircularvirus_2 |
| JF755426  | Peromyscus_adeno_associated_virus_M_6_USA_2010           |
| NC_038493 | Pteropus_associated_gemycircularvirus_10                 |
| NC_038489 | Pteropus_associated_gemycircularvirus_6                  |
| LC426696  | Rhinolophus_sinicus_polyomavirus_1                       |
| KX420939  | Rotavirus_A                                              |
| KC960620  | Rotavirus_A                                              |
| KC960622  | Rotavirus_A                                              |
| KX814956  | Rotavirus_A                                              |
| MN528120  | Rotavirus_A                                              |
| MN528105  | Rotavirus_A                                              |
| MN567261  | Rotavirus_A                                              |
| NC_030843 | Washington_bat_picornavirus                              |
| MN565031  | Acute_bee_paralysis_virus                                |
| MN099038  | Ambidensovirus_Croatia_17_S17                            |
| MK704471  | Aphid_lethal_paralysis_virus                             |
| KJ817182  | Aphid_lethal_paralysis_virus                             |
| MF458893  | Aphid_lethal_paralysis_virus                             |
| MN510869  | Aphid_lethal_paralysis_virus                             |
| MT096523  | Aphid_lethal_paralysis_virus_insect_metagenome_          |
| NC_040347 | Bark_beetle_associated_genomovirus_1                     |
| MG571097  | Bark_beetle_associated_genomovirus_6                     |
| KX644942  | Bat_cripavirus                                           |
| NC_035139 | Bemisia_associated_genomovirus_NfO                       |

|           |                                                |
|-----------|------------------------------------------------|
| MK433234  | Blackfly_genomovirus_2                         |
| MT416539  | Black_queen_cell_virus                         |
| NC_005041 | Blattella_germanica_densovirus_1               |
| AF375296  | Casphalia_extranea_densovirus                  |
| NC_025219 | Cripavirus_NB_1_2011_HUN                       |
| MH188043  | Culex_densovirus                               |
| MH545507  | Cybaeus_spider_associated_circular_virus_2     |
| NC_023842 | Danaus_plexippus_plexippus_iteravirus          |
| MN565037  | Deformed_wing_virus__DWV_                      |
| NC_001899 | Diatraea_saccharalis_densovirus                |
| MN918742  | Dicistroviridae_sp__bird_metagenome_           |
| MN905969  | Dicistroviridae_sp__bird_metagenome_           |
| MN917664  | Dicistroviridae_sp__bird_metagenome_           |
| MN905986  | Dicistroviridae_sp__bird_metagenome_           |
| NC_023871 | Dragonfly_associated_circular_virus_2          |
| KU754505  | Empeyrat_virus                                 |
| NC_023021 | Formica_exsecta_virus_1                        |
| NC_040346 | Giant_house_spider_associated_circular_virus_1 |
| NC_029052 | Goose_dicistrovirus                            |
| AY605055  | Haemagogus_equinus_densovirus                  |
| NC_040611 | Hedgehog_dicipivirus                           |
| JQ894784  | Helicoverpa_armigera_densovirus                |
| MH310078  | Hypsignathus_monstrosus_dicistrovirus          |
| NC_023615 | Invertebrate_iridescent_virus_22               |
| NC_023613 | Invertebrate_iridovirus_25                     |
| KC690269  | Israeli_acute_paralysis_virus__IAPV_           |
| KY465690  | Israeli_acute_paralysis_virus__IAPV_           |
| MG963176  | Iteravirus_sp_                                 |
| KC883978  | Junonia_coenia_densovirus                      |
| AY275710  | Kashmir_bee_virus                              |
| NC_035450 | Lasius_neglectus_virus_1                       |
| NC_035456 | Lasius_niger_virus_1                           |
| NC_035457 | Myrmica_scabrinodis_virus_1                    |
| MH477289  | Myrmica_scabrinodis_virus_2                    |
| NC_005341 | Mythimna_loreyi_densovirus                     |
| NC_038482 | Odonata_associated_gemycircularvirus_1         |
| NC_034217 | Pityohyphantes_rubrofasciatus_iflavirus        |
| MW826528  | Polycipiviridae_sp_                            |
| NC_034217 | Pityohyphantes_rubrofasciatus_iflavirus        |
| MW826528  | Polycipiviridae_sp_                            |
| MG545287  | Sacbrood_virus                                 |
| NC_018399 | Sibine_fusca_densovirus                        |
| NC_040338 | Sierra_dome_spider_associated_circular_virus_1 |
| MH545504  | Spider_associated_circular_virus_1             |
| MH545502  | Termite_associated_circular_virus_2            |
| NC_033742 | Thrips_associated_genomovirus_3                |
| MF173067  | Tick_associated_genomovirus_3                  |
| AY251269  | Varroa_destructor_virus_1                      |
| NC_037062 | Varroa_mite_associated_genomovirus_1           |



---

NC\_015780

Wiseana\_iridescent\_virus

---
