# Supplementary material for: Virus Diversity, Abundance, and Evolution in Three Different Bat Colonies in Switzerland
Source: Viruses. 2022 Aug 29;14(9):1911. doi: 10.3390/v14091911 (PMC9505930; doi:10.3390/v14091911)
Supplement: Supplementary file 1 [file viruses-14-01911-s001.zip]

Archive with 6 entries (6 files):
- Figure S1.tif
- Figure S2.tif
- Figure S3.tif
- Supplementary captation.pdf
- Table S1.pdf
- Table S2.pdf
